# Supplementary material
Source: PubMed Central journal article supplement (PMC5744650)
Supplement: EHP1050.s001.acco.pdf [file EHP1050.s001.acco.pdf]

**Note to readers with disabilities:** *EHP* strives to ensure that all journal content is accessible to all readers. However, some figures and Supplemental Material published in *EHP* articles may not conform to [508 standards](#) due to the complexity of the information being presented. If you need assistance accessing journal content, please contact [ehponline@niehs.nih.gov](mailto:ehponline@niehs.nih.gov). Our staff will work with you to assess and meet your accessibility needs within 3 working days.

## **Supplemental Material**

### **Prostate Cancer Risk and DNA Methylation Signatures in Aging Rats following Developmental BPA Exposure: A Dose–Response Analysis**

Gail S. Prins, Shu-Hua Ye, Lynn Birch, Xiang Zhang, Ana Cheong, Han Lin, Esther Calderon-Gierszal, Jacob Groen, Wen-Yang Hu, Shuk-Mei Ho, and Richard B. van Breemen

#### **Table of Contents**

**Figure S1:** **A:** Schematic representation of the experimental design for the animal studies. **B:** Transverse section through the Day 200 rat prostate-urogenital complex with the prostate lobes labeled as DP=dorsal, LP=lateral, VP=ventral and PU ducts = periurethral prostatic ducts. Magnified inset demarcates the regional periurethral prostate ducts that drain into the urethra. The section includes half of the bilateral prostatic lobes since the remaining VP, LP and DP was removed at autopsy and snap-frozen for molecular analysis.

**Figure S2:** Serum testosterone and  $17\beta$ -estradiol levels in Day 200 and Day 365 rats given empty or T+E capsules on Day 90 of life. N=8 for each group.

**Table S1:** Prostate (T&E) Pathology in day 200 Rats

**Table S2:** Prostate (T&E) Pathology in Aged (day 365) Rats

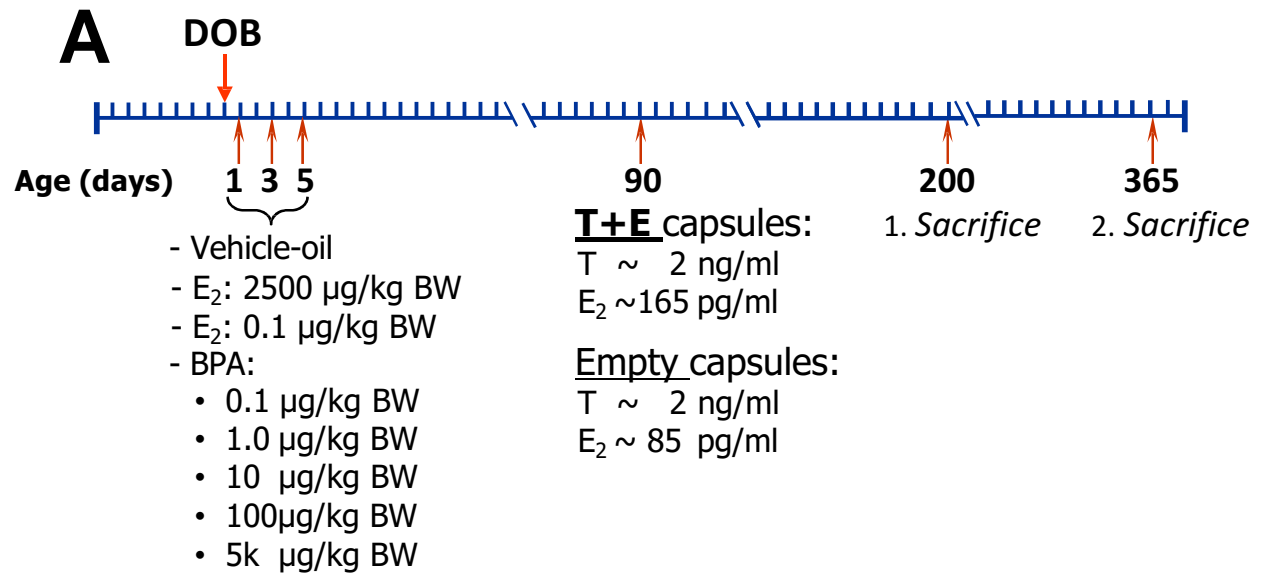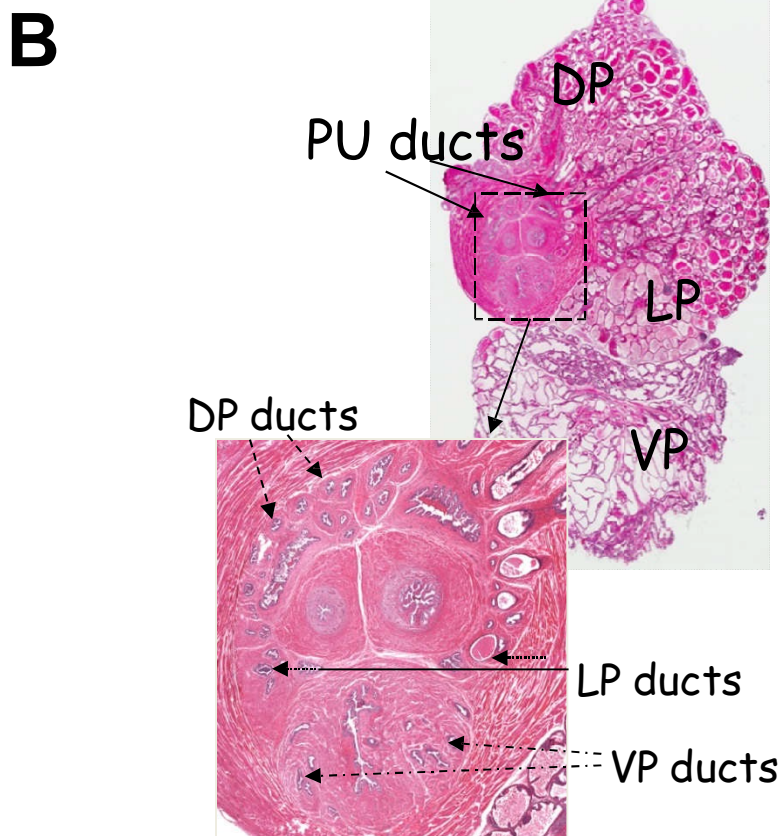

**Figure S1:** **A:** Schematic representation of the experimental design for the animal studies. **B:** Transverse section through the Day 200 rat prostate-urogenital complex with the prostate lobes labeled as DP=dorsal, LP=lateral, VP=ventral and PU ducts = periurethral prostatic ducts. Magnified inset demarcates the regional periurethral prostate ducts that drain into the urethra. The section includes half of the bilateral prostatic lobes since the remaining VP, LP and DP was removed at autopsy and snap-frozen for molecular analysis.

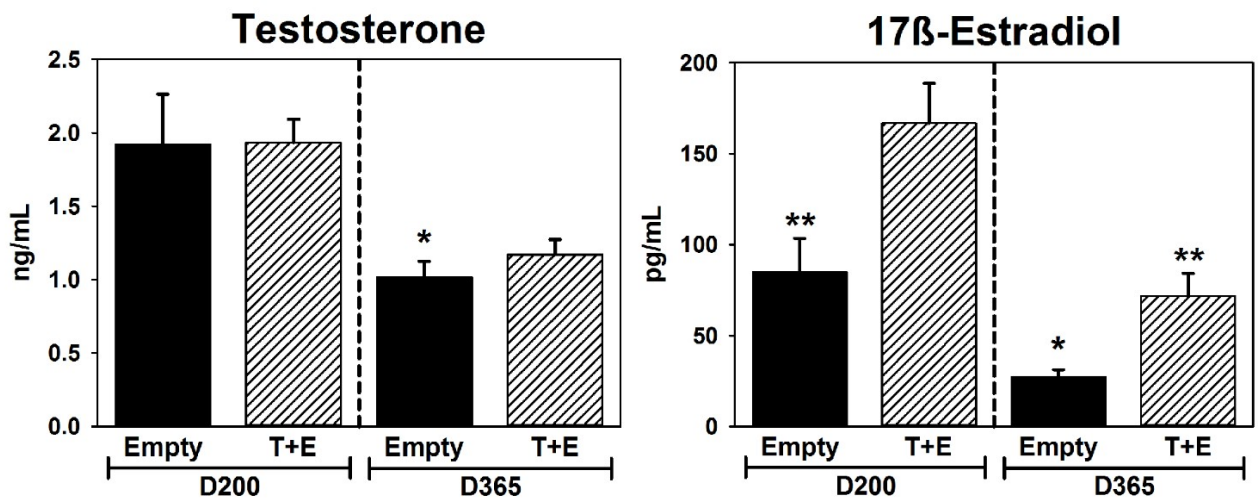

**Figure S2:** Serum testosterone and 17 $\beta$ -estradiol levels in Day 200 and Day 365 rats given empty or T+E capsules on Day 90 of life. N=8 for each group. For testosterone data, \* denotes P<0.05 versus empty capsule rats at Day 200. For estradiol data, \* denotes P<0.01 versus T+E Day 365 rats; \*\* denotes P<0.001 vs T+E Day 200 rats.

**Table S1: Prostate (T&E) Pathology in day 200 Rats**

| µg/kg BW                            | PIN                 |                     |                  | Hyperplasia         |                     | Inflammation |           |
|-------------------------------------|---------------------|---------------------|------------------|---------------------|---------------------|--------------|-----------|
|                                     | Score               | Incidence           |                  | Score               | Incidence           | Score        | Incidence |
|                                     |                     | All                 | HGPIN            |                     |                     |              |           |
| <b>Dorsal Lobes</b>                 |                     |                     |                  |                     |                     |              |           |
| <b>Vehicle + empty</b>              | 0.3                 | 10%                 | 0%               | 0.10                | 10%                 | 0            | 0%        |
| <b>Vehicle + T&amp;E</b>            | 0.56                | 33%                 | 0%               | 0.89                | 56%                 | 0.10         | 9%        |
| <b>Low E2</b>                       | 0.12                | 12%                 | 0%               | 0.50                | 12%                 | 0            | 0%        |
| <b>High E2</b>                      | 1.43                | 50%                 | 25%              | 0.45                | 60%                 | 0            | 0%        |
| <b>0.1 BPA</b>                      | 0.86                | 40%                 | 20%              | 0.20                | 10%                 | 0.10         | 20%       |
| <b>1.0 BPA</b>                      | 1.00                | 78%                 | 11%              | 0.90                | 67%                 | 0.30         | 33%       |
| <b>10 BPA</b>                       | 1.00                | 50%                 | 11%              | 0.55                | 56%                 | 0.10         | 11%       |
| <b>100 BPA</b>                      | 2.00 <sup>a</sup>   | 75%                 | 50% <sup>a</sup> | 0.75                | 38%                 | 0.50         | 38%       |
| <b>5K BPA</b>                       | 1.20                | 60%                 | 20%              | 1.10                | 90% <sup>b</sup>    | 0.10         | 10%       |
| <b>(a) vs Veh + T&amp;E</b>         | P<0.05              | n.s.                | P<0.05           | n.s.                |                     | n.s.         | n.s.      |
| <b>(b) vs Low E2</b>                |                     |                     |                  |                     | P<0.02              |              |           |
| <b>(b) vs 0.1 BPA</b>               |                     |                     |                  |                     | P<0.001             |              |           |
| <b>Ventral Lobes</b>                |                     |                     |                  |                     |                     |              |           |
| <b>Vehicle + empty</b>              | 0.2                 | 10%                 | 0%               | 0.20                | 20%                 | 0            | 0%        |
| <b>Vehicle + T&amp;E</b>            | 0.11                | 10%                 | 0%               | 0.67                | 44%                 | 0            | 0%        |
| <b>Low E2</b>                       | 0.25                | 25%                 | 0%               | 0.50                | 25%                 | 0.25         | 25%       |
| <b>High E2</b>                      | 1.00 <sup>a</sup>   | 45%                 | 9%               | 2.00 <sup>a</sup>   | 91% <sup>a,b</sup>  | 0.18         | 9%        |
| <b>0.1 BPA</b>                      | 0.20                | 20%                 | 0%               | 1.40                | 90% <sup>a,b</sup>  | 0.30         | 30%       |
| <b>1.0 BPA</b>                      | 0.67                | 44%                 | 11%              | 1.22                | 78% <sup>a,b</sup>  | 0.11         | 22%       |
| <b>10 BPA</b>                       | 0.67                | 44%                 | 0%               | 1.56                | 100% <sup>a,b</sup> | 0.44         | 22%       |
| <b>100 BPA</b>                      | 1.00 <sup>a</sup>   | 50%                 | 12%              | 1.88                | 75% <sup>a,b</sup>  | 0.12         | 12%       |
| <b>5K BPA</b>                       | 0.50                | 40%                 | 0%               | 1.70 <sup>a</sup>   | 100% <sup>a,b</sup> | 0.10         | 10%       |
| <b>(a) vs Veh+T&amp;E</b>           | P<0.05              | n.s.                | n.s.             | P<0.05              | P<0.02              | n.s.         | n.s.      |
| <b>(a) vs Low E2</b>                |                     |                     |                  | P<0.05              |                     |              |           |
| <b>(b) vs Low E2</b>                |                     |                     |                  |                     | P<0.005             |              |           |
| <b>Periurethral Prostatic Ducts</b> |                     |                     |                  |                     |                     |              |           |
| <b>Vehicle + empty</b>              | 0.2                 | 20%                 | 0%               | 0.44                | 32%                 | 0            | 0%        |
| <b>Vehicle + T&amp;E</b>            | 0.11                | 20%                 | 0%               | 0.33                | 29%                 | 0            | 0%        |
| <b>Low E2</b>                       | 0.00                | 0%                  | 0%               | 0.43                | 50%                 | 0            | 0%        |
| <b>High E2</b>                      | 1.33                | 67% <sup>a,c</sup>  | 33% <sup>a</sup> | 1.20                | 78%                 | 0            | 0%        |
| <b>0.1 BPA</b>                      | 1.43 <sup>c</sup>   | 70% <sup>a,c</sup>  | 0%               | 1.90 <sup>b,c</sup> | 100% <sup>b</sup>   | 0            | 0%        |
| <b>1.0 BPA</b>                      | 1.55 <sup>a</sup>   | 78% <sup>a,c</sup>  | 33% <sup>b</sup> | 1.88 <sup>a,c</sup> | 67% <sup>a</sup>    | 0.25         | 25%       |
| <b>10 BPA</b>                       | 2.00 <sup>b,d</sup> | 100% <sup>b,d</sup> | 33% <sup>b</sup> | 1.89 <sup>a,c</sup> | 89% <sup>b</sup>    | 0.11         | 11%       |
| <b>100 BPA</b>                      | 2.00 <sup>a,c</sup> | 80% <sup>a,c</sup>  | 40% <sup>a</sup> | 2.40 <sup>b,c</sup> | 100% <sup>b</sup>   | 0            | 0%        |
| <b>5K BPA</b>                       | 1.67 <sup>a,c</sup> | 71% <sup>a,c</sup>  | 29%              | 1.29                | 86% <sup>a</sup>    | 0.11         | 11%       |
| <b>(a) vs Veh+T&amp;E</b>           | P<0.05              | P<0.05              | P<0.05           | P<0.05              | P<0.05              | n.s.         | n.s.      |
| <b>(b) vs Veh+T&amp;E</b>           | P<0.01              | P<0.001             | P<0.01           | P<0.01              | P<0.01              |              |           |
| <b>(c) vs Low E2</b>                | P<0.05              | P<0.05              |                  | P<0.05              |                     |              |           |
| <b>(d) vs Low E2</b>                | P<0.01              | P<0.001             |                  |                     |                     |              |           |

**Table S1:** Day 200 lesion incidence and scores (0-3) for PIN, hyperplasia and inflammation in the dorsal lobes, ventral lobes and periurethral prostatic ducts.

**Table S2: Prostate (T&E) Pathology in Aged (day 365) Rats**

| µg/kg BW                            | PIN                 |           |                    | Carcinoma-Microinvasion |                  | Carcinoma-Glandular |                    | Hyperplasia         |                  | Inflammation        |                    |
|-------------------------------------|---------------------|-----------|--------------------|-------------------------|------------------|---------------------|--------------------|---------------------|------------------|---------------------|--------------------|
|                                     | Score               | Incidence |                    | Incidence               |                  | Incidence           |                    | Score               | Incidence        | Score               | Incidence          |
| <b>Dorsal Lobes</b>                 |                     |           |                    |                         |                  |                     |                    |                     |                  |                     |                    |
| <b>Vehicle + Empty</b>              | 0.06                | 1/17      | 6%                 | 0/17                    | 0%               | 0/17                | 0%                 | 0.41                | 35%              | 0.00                | 0%                 |
| <b>Vehicle + T&amp;E</b>            | 0.44                | 4/18      | 22%                | 1/18                    | 6%               | 0/18                | 0%                 | 0.56                | 39%              | 0.14                | 11%                |
| <b>Low E2</b>                       | 0.21                | 3/14      | 21%                | 1/14                    | 7%               | 0/14                | 0%                 | 1.07                | 71% <sup>a</sup> | 0.14                | 7%                 |
| <b>High E2</b>                      | 1.23 <sup>a,b</sup> | 14/26     | 54% <sup>a,b</sup> | 5/26                    | 19%              | 2/26                | 8%                 | 1.36                | 54%              | 0.62                | 31% <sup>a</sup>   |
| <b>10 BPA</b>                       | 0.38                | 5/21      | 24%                | 3/21                    | 14%              | 1/21                | 5%                 | 0.86                | 52%              | 0.00                | 0%                 |
| <b>(a) vs Veh+empty</b>             | P<0.01              | P<0.01    |                    | n.s.                    |                  | n.s.                |                    | n.s.                | P<0.05           | n.s.                | P<0.01             |
| <b>(b) vs Veh+T&amp;E</b>           | P<0.05              | P<0.05    |                    | n.s.                    |                  | n.s.                |                    | n.s.                | n.s.             | n.s.                | n.s.               |
| <b>Ventral Lobes</b>                |                     |           |                    |                         |                  |                     |                    |                     |                  |                     |                    |
| <b>Vehicle + Empty</b>              | 0.18                | 1/17      | 6%                 | 0/17                    | 0%               | 0/17                | 0%                 | 0.24                | 12%              | 0.00                | 0%                 |
| <b>Vehicle + T&amp;E</b>            | 0.17                | 3/18      | 17%                | 0/18                    | 0%               | 0/18                | 0%                 | 0.67 <sup>a</sup>   | 50% <sup>a</sup> | 0.11                | 6%                 |
| <b>Low E2</b>                       | 0.36                | 3/14      | 21%                | 1/14                    | 7%               | 0/14                | 0%                 | 0.86 <sup>a</sup>   | 57% <sup>a</sup> | 0.14                | 7%                 |
| <b>High E2</b>                      | 1.88 <sup>a,b</sup> | 22/26     | 85% <sup>a,b</sup> | 5/26                    | 19% <sup>a</sup> | 2/26                | 8%                 | 1.73 <sup>a,b</sup> | 69% <sup>a</sup> | 1.12                | 38% <sup>a,b</sup> |
| <b>10 BPA</b>                       | 0.67                | 9/21      | 43% <sup>c</sup>   | 1/21                    | 5%               | 0/21                | 0%                 | 1.05 <sup>a</sup>   | 71% <sup>a</sup> | 0.19                | 10%                |
| <b>(a) vs Veh+empty</b>             | P<0.001             | P<0.001   |                    | P=0.06                  |                  | n.s.                |                    | P<0.01              | P<0.01           | n.s.                | P<0.01             |
| <b>(b) vs Veh+T&amp;E</b>           | P<0.001             | P<0.001   |                    | n.s.                    |                  | n.s.                |                    | n.s.                | n.s.             | n.s.                | P<0.01             |
| <b>(c) vs Veh+T&amp;E</b>           |                     | P<0.01    |                    |                         |                  |                     |                    |                     |                  |                     |                    |
| <b>Periurethral Prostatic Ducts</b> |                     |           |                    |                         |                  |                     |                    |                     |                  |                     |                    |
| <b>Vehicle + Empty</b>              | 0.24                | 2/17      | 12%                | 1/17                    | 6%               | 1/17                | 6%                 | 0.71                | 35%              | 0.00                | 0%                 |
| <b>Vehicle + T&amp;E</b>            | 0.44                | 5/18      | 28%                | 1/18                    | 6%               | 0/18                | 0%                 | 0.67                | 56%              | 0.00                | 0%                 |
| <b>Low E2</b>                       | 0.79                | 6/14      | 43% <sup>a</sup>   | 1/14                    | 7%               | 0/14                | 0%                 | 1.07                | 64%              | 0.00                | 0%                 |
| <b>High E2</b>                      | 1.54 <sup>a,b</sup> | 17/26     | 65% <sup>a,b</sup> | 7/26                    | 27%              | 8/26                | 31% <sup>a,b</sup> | 1.35 <sup>b</sup>   | 62% <sup>b</sup> | 0.65 <sup>a,b</sup> | 23% <sup>a,b</sup> |
| <b>10 BPA</b>                       | 0.71                | 9/21      | 43% <sup>a</sup>   | 2/21                    | 10%              | 3/21                | 14%                | 0.86                | 57%              | 0.05                | 5%                 |
| <b>(a) vs Veh+empty</b>             | P<0.05              | P<0.05    |                    | n.s.                    |                  | P<0.05              |                    | n.s.                | n.s.             | P<0.05              | P<0.05             |
| <b>(b) vs Veh+T&amp;E</b>           | P<0.05              | P<0.05    |                    | n.s.                    |                  | P<0.05              |                    | P<0.05              | P<0.05           | P<0.05              | P<0.05             |

**Table S2:** Day 365 lesion incidence and scores (0-3) -for HGPIN, microinvasion, carcinoma-glandular, hyperplasia and inflammation in the dorsal lobes, ventral lobes and periurethral prostatic ducts.
